# Supplementary material
Source: publisher figshare collection journal article supplement (https://sage.figshare.com/ndownloader/files/18531185)
Supplement: Supplementary file 1 [file 18531185]

**Table A1** Non-sterile equipment, excluding hand hygiene products, touched by non-scrubbed healthcare workers. During 11 full length (12 hours 50 minutes) surgical operations.

| Rank | frequency of hand contact event (HCE) | Non-sterile equipment touched by non-scrubbed staff immediately after patient contact | Total HCE (N=591) |
|------|---------------------------------------|---------------------------------------------------------------------------------------|-------------------|
| 1    |                                       | Storage trolley top                                                                   | 46                |
| 2    |                                       | IV bag/line                                                                           | 46                |
| 3    |                                       | OR table control                                                                      | 41                |
| 4    |                                       | Door plate                                                                            | 33                |
| 5    |                                       | Anaesthetic work station                                                              | 26                |
| 6    |                                       | Suction canister/tubes                                                                | 25                |
| 7    |                                       | IV Pole                                                                               | 25                |
| 8    |                                       | Positioning supports                                                                  | 24                |
| 9    |                                       | Ward bed upper surface                                                                | 23                |
| 10   |                                       | Olympus stack                                                                         | 23                |
| 11   |                                       | Patient notes                                                                         | 21                |
| 12   |                                       | Bedding/gown                                                                          | 20                |
| 13   |                                       | Anaesthetic work station IV tray                                                      | 16                |
| 14   |                                       | Breathing circuit                                                                     | 16                |
| 15   |                                       | Operating table top                                                                   | 15                |
| 16   |                                       | Moving and handling glide board/sheet                                                 | 14                |
| 17   |                                       | Oxygen mask/tubing                                                                    | 14                |
| 18   |                                       | ECG cables                                                                            | 13                |
| 19   |                                       | Oxygen cylinder                                                                       | 11                |
| 20   |                                       | Moving and handling machine                                                           | 11                |
| 21   |                                       | Seats upper surface                                                                   | 10                |
| 22   |                                       | Blood Pressure cables/cuff                                                            | 9                 |
| 23   |                                       | Medication canister                                                                   | 9                 |
| 24   |                                       | Oxygen saturation probe and cables                                                    | 9                 |
| 25   |                                       | IV Pump buttons                                                                       | 8                 |
| 26   |                                       | Operating light handle outer edge                                                     | 7                 |
| 27   |                                       | Storage trolley drawer                                                                | 6                 |
| 28   |                                       | OR phone                                                                              | 6                 |
| 29   |                                       | Monitors (excluding computer monitor)                                                 | 6                 |
| 30   |                                       | Computer keyboard and mouse                                                           | 6                 |
| 31   |                                       | Syringe                                                                               | 5                 |
| 32   |                                       | Waste bag                                                                             | 5                 |
| 33   |                                       | Elastic adhesive bandage                                                              | 4                 |
| 34   |                                       | Diathermy machine                                                                     | 3                 |
| 35   |                                       | Warming blanket/machine                                                               | 3                 |
| 36   |                                       | Vascular compression garment                                                          | 3                 |
| 37   |                                       | Ward bed control                                                                      | 3                 |
| 38   |                                       | Urinary Catheter                                                                      | 3                 |
| 39   |                                       | Laryngoscope                                                                          | 2                 |
| 40   |                                       | Sharps bin lid                                                                        | 2                 |
| 41   |                                       | Basin on wheels top edge                                                              | 2                 |
| 42   |                                       | Disposable floor cable safety mat                                                     | 2                 |
| 43   |                                       | Blood glucose monitor                                                                 | 1                 |
| 44   |                                       | Clamp                                                                                 | 1                 |
| 45   |                                       | Foot button                                                                           | 1                 |
| 46   |                                       | Laryngeal mask packet                                                                 | 1                 |
| 47   |                                       | Medication cupboard                                                                   | 1                 |
| 48   |                                       | Microscope remote control                                                             | 1                 |
| 49   |                                       | Needle packets                                                                        | 1                 |
| 50   |                                       | Pen                                                                                   | 1                 |
| 51   |                                       | Personal Protective Equipment dispenser                                               | 1                 |
| 52   |                                       | Non-sterile glove                                                                     | 1                 |
| 53   |                                       | Shelf (for notes)                                                                     | 1                 |
| 54   |                                       | Urinary catheter support                                                              | 1                 |
| 55   |                                       | Clip board                                                                            | 1                 |
| 56   |                                       | Light Switch                                                                          | 1                 |
| 57   |                                       | Nappy                                                                                 | 1                 |

**Appendix Table A2.** Non-sterile equipment touched by non-scrubbed staff during a full length (185 minutes) Ophthalmology surgery (Ophthalmology 2 Adult)

| Non-sterile equipment touched in the patient zone | Hand contact events | Non-sterile equipment touched in the healthcare zone | Hand contact events |
|---------------------------------------------------|---------------------|------------------------------------------------------|---------------------|
| IV bag/line                                       | 7                   | Door plate                                           | 1                   |
| OR table control                                  | 6                   | Clip board                                           | 1                   |
| IV Pole                                           | 5                   |                                                      |                     |
| Operating table top                               | 4                   |                                                      |                     |
| Ward bed upper surface                            | 4                   |                                                      |                     |
| Moving and handling glide board/sheet             | 4                   |                                                      |                     |
| Oxygen cylinder                                   | 3                   |                                                      |                     |
| IV Pump buttons                                   | 3                   |                                                      |                     |
| Suction canister/tubes                            | 3                   |                                                      |                     |
| Anaesthetic work station IV tray                  | 3                   |                                                      |                     |
| Urinary Catheter                                  | 3                   |                                                      |                     |
| Syringe                                           | 2                   |                                                      |                     |
| Olympus stack                                     | 2                   |                                                      |                     |
| Warming blanket/machine                           | 2                   |                                                      |                     |
| Storage trolley top                               | 1                   |                                                      |                     |
| Positioning supports                              | 1                   |                                                      |                     |
| Blood Pressure cables/cuff                        | 1                   |                                                      |                     |
| Ward bed control                                  | 1                   |                                                      |                     |
| Vascular compression garment                      | 1                   |                                                      |                     |

| <b>Table A3. Non-sterile equipment touched by non-scrubbed staff during a full length (80 minutes) Gynaecology surgery. Gynaecology 1 Adult</b> |                     |                                                      |                     |
|-------------------------------------------------------------------------------------------------------------------------------------------------|---------------------|------------------------------------------------------|---------------------|
| Non-sterile equipment touched in the patient zone                                                                                               | Hand contact events | Non-sterile equipment touched in the healthcare zone | Hand contact events |
| OR table control                                                                                                                                | 12                  | Medication canister                                  | 4                   |
| Storage trolley top                                                                                                                             | 8                   | Door plate                                           | 3                   |
| Seats upper surface                                                                                                                             | 5                   | shelf (for notes)                                    | 1                   |
| Anaesthetic work station                                                                                                                        | 3                   | PPE Gloves                                           | 1                   |
| IV Pump buttons                                                                                                                                 | 3                   | Medication cupboard                                  | 1                   |
| IV Pole                                                                                                                                         | 2                   | Waste bag                                            | 1                   |
| Bedding/gown                                                                                                                                    | 2                   | Floor cable safety mat                               | 2                   |
| Blood Pressure cables/cuff                                                                                                                      | 1                   | Sharps bin lid                                       | 1                   |
| Operating light handle outer edge                                                                                                               | 1                   | Foot button                                          | 1                   |
| Urinary Catheter Support                                                                                                                        | 1                   | Storage trolley drawer                               | 1                   |
| Olympus stack                                                                                                                                   | 1                   |                                                      |                     |
| Syringe                                                                                                                                         | 1                   |                                                      |                     |
| Moving and handling glide board/sheet                                                                                                           | 1                   |                                                      |                     |
| Vascular compression garment                                                                                                                    | 1                   |                                                      |                     |
| Warming blanket/machine                                                                                                                         | 1                   |                                                      |                     |

**Appendix Table A4.** Non-sterile equipment touched by non-scrubbed staff during a full length (40 minutes) Ear Nose Throat surgery. Ear Nose Throat 1 Adult

| Non-sterile equipment touched in the patient zone | Hand contact events | Non-sterile equipment touched in the healthcare zone | Hand contact events |
|---------------------------------------------------|---------------------|------------------------------------------------------|---------------------|
| Storage trolley top                               | 8                   | Elastic adhesive bandage                             | 3                   |
| Olympus stack                                     | 5                   | Door plate                                           | 3                   |
| Anaesthetic work station IV tray                  | 5                   | Storage trolley drawer                               | 2                   |
| Suction canister/tubes                            | 3                   | Laryngeal mask packet                                | 1                   |
| Anaesthetic work station                          | 2                   | Medication canister                                  | 1                   |
| IV Pole                                           | 2                   | Patient notes                                        | 4                   |
| Syringe                                           | 2                   |                                                      |                     |
| Breathing circuit                                 | 1                   |                                                      |                     |
| Oxygen mask/tubing                                | 1                   |                                                      |                     |
| Seats upper surface                               | 1                   |                                                      |                     |
| Positioning supports                              | 1                   |                                                      |                     |
| IV bag/line                                       | 1                   |                                                      |                     |
| Clamp                                             | 1                   |                                                      |                     |

**Appendix Table A5.** Non-sterile equipment touched by non-scrubbed staff during a full length (65 minutes) Ear Nose Throat surgery. Ear Nose Throat 2 Adult

| Non-sterile equipment touched in the patient zone | Hand contact events | Non-sterile equipment touched in the healthcare zone | Hand contact events |
|---------------------------------------------------|---------------------|------------------------------------------------------|---------------------|
| Storage trolley top                               | 12                  | Door plate                                           | 3                   |
| Anaesthetic work station                          | 6                   | Medication box                                       | 1                   |
| Bedding/gown                                      | 5                   | Pen                                                  | 1                   |
| Ward bed upper surface                            | 4                   | Elastic adhesive bandage                             | 1                   |
| IV bag/line                                       | 4                   | Storage trolley drawer                               | 1                   |
| Blood Pressure cables/cuff                        | 4                   | Patient notes                                        | 2                   |
| Oxygen mask/tubing                                | 3                   |                                                      |                     |
| Positioning supports                              | 3                   |                                                      |                     |
| Oxygen saturation probe and cables                | 3                   |                                                      |                     |
| Oxygen cylinder                                   | 3                   |                                                      |                     |
| Suction canister/tubes                            | 3                   |                                                      |                     |
| Laryngoscope                                      | 2                   |                                                      |                     |
| Operating table top                               | 2                   |                                                      |                     |
| ECG cables                                        | 2                   |                                                      |                     |
| Olympus stack                                     | 2                   |                                                      |                     |
| Breathing circuit                                 | 1                   |                                                      |                     |
| Moving and handling glide board/sheet             | 1                   |                                                      |                     |

**Appendix Table A6.** Non-sterile equipment touched by non-scrubbed staff during a full length (40 minutes) Ear Nose Throat surgery. Ear Nose Throat 3 Adult

| Non-sterile equipment touched in the patient zone | Hand contact events | Non-sterile equipment touched in the healthcare zone | Hand contact events |
|---------------------------------------------------|---------------------|------------------------------------------------------|---------------------|
| IV bag/line                                       | 11                  | Door plate                                           | 2                   |
| Storage trolley top                               | 10                  | Comp. keyboard & mouse                               | 1                   |
| Suction canister/tubes                            | 6                   | Storage trolley drawer                               | 1                   |
| OR table control                                  | 5                   |                                                      |                     |
| Anaesthetic work station IV tray                  | 3                   |                                                      |                     |
| Oxygen saturation probe and cables                | 3                   |                                                      |                     |
| Diathermy machine                                 | 3                   |                                                      |                     |
| Anaesthetic work station                          | 3                   |                                                      |                     |
| Bedding/gown                                      | 2                   |                                                      |                     |
| IV Pump buttons                                   | 2                   |                                                      |                     |
| Positioning supports                              | 1                   |                                                      |                     |
| Operating table top                               | 1                   |                                                      |                     |
| Breathing circuit                                 | 1                   |                                                      |                     |
| Ward bed control                                  | 1                   |                                                      |                     |
| IV Pole                                           | 1                   |                                                      |                     |
| Moving and handling glide board/sheet             | 1                   |                                                      |                     |

**Appendix Table A7.** Non-sterile equipment touched by non-scrubbed staff during a full length (60 minutes) maxillofacial surgery. Maxillofacial 1 Adult

| Non-sterile equipment touched in the patient zone | Hand contact events | Non-sterile equipment touched in the healthcare zone | Hand contact events |
|---------------------------------------------------|---------------------|------------------------------------------------------|---------------------|
| IV bag/line                                       | 12                  | Comp. keyboard & mouse                               | 4                   |
| Moving and handling machine                       | 10                  | Door plate                                           | 3                   |
| IV Pole                                           | 4                   | Patient notes                                        | 3                   |
| Positioning supports                              | 3                   | OR phone                                             | 2                   |
| Olympus stack                                     | 2                   | Sharps bin lid                                       | 1                   |
| Operating light handle outer edge                 | 2                   | Storage trolley drawer                               | 1                   |
| Anaesthetic work station IV tray                  | 1                   |                                                      |                     |
| Oxygen cylinder                                   | 1                   |                                                      |                     |
| Seats upper surface                               | 1                   |                                                      |                     |
| Oxygen mask/tubing                                | 1                   |                                                      |                     |

**Appendix Table A8.** Non-sterile equipment touched by non-scrubbed staff during a full length (30 minutes) maxillofacial surgery. Maxillofacial2 Children

| Non-sterile equipment touched in the patient zone | Hand contact events | Non-sterile equipment touched in the healthcare zone | Hand contact events |
|---------------------------------------------------|---------------------|------------------------------------------------------|---------------------|
| Oxygen mask/tubing                                | 4                   | Patient notes                                        | 4                   |
| Oxygen cylinder                                   | 4                   | Door plate                                           | 1                   |
| Operating table top                               | 4                   |                                                      |                     |
| Anaesthetic work station IV tray                  | 3                   |                                                      |                     |
| Anaesthetic work station                          | 2                   |                                                      |                     |
| Olympus stack                                     | 2                   |                                                      |                     |
| Breathing circuit                                 | 2                   |                                                      |                     |
| Storage trolley top                               | 1                   |                                                      |                     |
| ECG cables                                        | 1                   |                                                      |                     |



| <b>Appendix Table A9. Non-sterile equipment touched by non-scrubbed staff during a full length (55 minutes) ophthalmology surgery. Ophthalmology 1 Adult</b> |                     |                                                      |                     |
|--------------------------------------------------------------------------------------------------------------------------------------------------------------|---------------------|------------------------------------------------------|---------------------|
| Non-sterile equipment touched in the patient zone                                                                                                            | Hand contact events | Non-sterile equipment touched in the healthcare zone | Hand contact events |
| IV bag/line                                                                                                                                                  | 5                   | Door plate                                           | 5                   |
| IV Pole                                                                                                                                                      | 3                   | OR phone                                             | 3                   |
| OR table control                                                                                                                                             | 1                   | Patient notes                                        | 2                   |
| Breathing circuit                                                                                                                                            | 1                   | Waste bag                                            | 2                   |
| Positioning supports                                                                                                                                         | 1                   | Comp. keyboard & mouse                               | 1                   |
| Blood glucose monitor                                                                                                                                        | 1                   | PPE dispenser                                        | 1                   |
| Anaesthetic work station IV tray                                                                                                                             | 1                   | Needle packets                                       | 1                   |
| Basin on wheels top edge                                                                                                                                     | 1                   |                                                      |                     |
| Microscope remote control                                                                                                                                    | 1                   |                                                      |                     |

**Appendix Table A10.** Non-sterile equipment touched by non-scrubbed staff during a full length (80 minutes) urology surgery. Urology 1 Adult

| Non-sterile equipment touched in the patient zone | Hand contact events | Non-sterile equipment touched in the healthcare zone | Hand contact events |
|---------------------------------------------------|---------------------|------------------------------------------------------|---------------------|
| Storage trolley top                               | 6                   | Door plate                                           | 3                   |
| Positioning supports                              | 6                   | Waste bag                                            | 2                   |
| IV bag/line                                       | 6                   | OR phone                                             | 1                   |
| IV Pole                                           | 6                   | Patient notes                                        | 1                   |
| Suction canister/tubes                            | 5                   |                                                      |                     |
| Olympus stack                                     | 4                   |                                                      |                     |
| Monitors (excluding computer monitor)             | 3                   |                                                      |                     |
| Anaesthetic work station                          | 3                   |                                                      |                     |
| OR table control                                  | 3                   |                                                      |                     |
| Bedding/gown                                      | 2                   |                                                      |                     |
| Seats upper surface                               | 2                   |                                                      |                     |
| Ward bed upper surface                            | 1                   |                                                      |                     |
| Ward bed control                                  | 1                   |                                                      |                     |
| Vascular compression garment                      | 1                   |                                                      |                     |
| Operating table top                               | 1                   |                                                      |                     |
| ECG cables                                        | 1                   |                                                      |                     |
| Moving and handling machine                       | 1                   |                                                      |                     |

**Appendix Table A11.** Non-sterile equipment touched by non-scrubbed staff during a full length (60 minutes) urology surgery. Urology 2 Children

| Non-sterile equipment touched in the patient zone | Hand contact events | Non-sterile equipment touched in the healthcare zone | Hand contact events |
|---------------------------------------------------|---------------------|------------------------------------------------------|---------------------|
| Positioning supports                              | 8                   | Door plate                                           | 3                   |
| Anaesthetic work station                          | 7                   | Medication canister                                  | 3                   |
| Ward bed upper surface                            | 6                   | Patient notes                                        | 2                   |
| Breathing circuit                                 | 6                   |                                                      |                     |
| ECG cables                                        | 5                   |                                                      |                     |
| Bedding/gown                                      | 5                   |                                                      |                     |
| Moving and handling glide board/sheet             | 4                   |                                                      |                     |
| Monitors (excluding computer monitor)             | 3                   |                                                      |                     |
| Oxygen mask/tubing                                | 3                   |                                                      |                     |
| Operating light handle outer edge                 | 3                   |                                                      |                     |
| Oxygen saturation probe and cables                | 3                   |                                                      |                     |
| Olympus stack                                     | 3                   |                                                      |                     |
| IV Pole                                           | 2                   |                                                      |                     |
| OR table control                                  | 2                   |                                                      |                     |

**Appendix Table A12.** Non-sterile equipment touched by non-scrubbed staff during a full length (75 minutes) urology surgery. Urology 3 Children

| Non-sterile equipment touched in the patient zone | Hand contact events | Non-sterile equipment touched in the healthcare zone | Hand contact events |
|---------------------------------------------------|---------------------|------------------------------------------------------|---------------------|
| Ward bed upper surface                            | 8                   | Door plate                                           | 6                   |
| Suction canister/tubes                            | 5                   | Patient notes                                        | 3                   |
| Breathing circuit                                 | 4                   | Light Switch                                         | 1                   |
| ECG cables                                        | 4                   |                                                      |                     |
| Bedding/gown                                      | 4                   |                                                      |                     |
| Operating table top                               | 3                   |                                                      |                     |
| Blood Pressure cables/cuff                        | 3                   |                                                      |                     |
| Moving and handling glide board/sheet             | 3                   |                                                      |                     |
| Olympus stack                                     | 2                   |                                                      |                     |
| Oxygen mask/tubing                                | 2                   |                                                      |                     |
| Operating light handle outer edge                 | 1                   |                                                      |                     |
| Seats upper surface                               | 1                   |                                                      |                     |
| Basin on wheels top edge                          | 1                   |                                                      |                     |
| Nappy                                             | 1                   |                                                      |                     |
